# Supplementary material for: Green active food packaging films based on nanocomposites of PHBV/sepiolite/essential oils
Source: Royal Society of Chemistry journal article supplement (doi:10.1039/d4fb00232f), 2025-01-01

**Suppl. Fig. 1.** GC-MS results for (a) OEO, (b) REO, and (c) BEO.

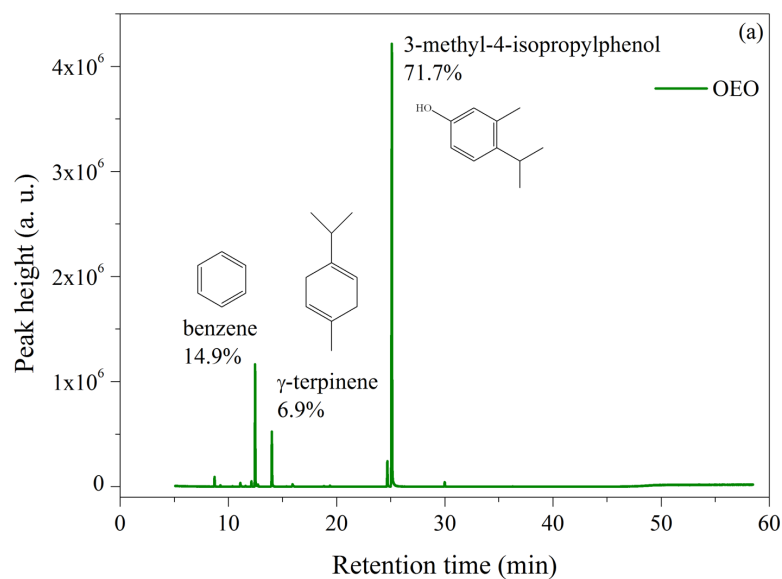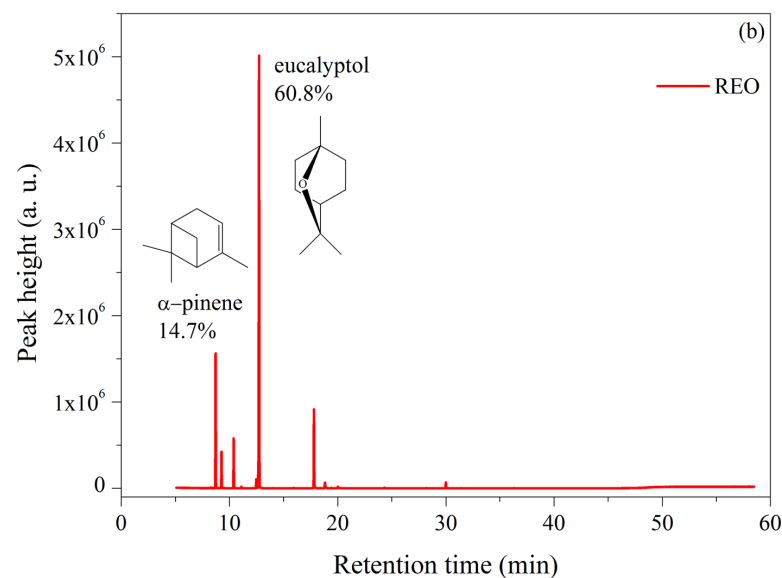

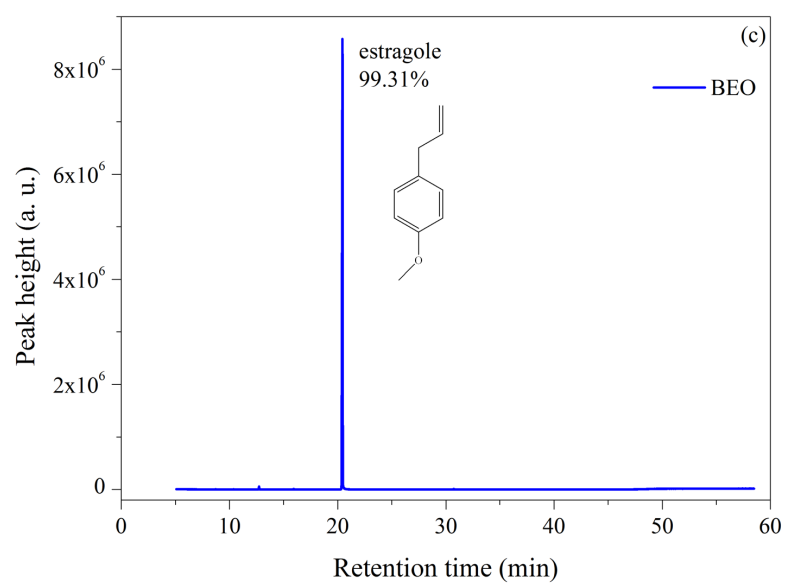

**Suppl. Fig. 2.** TGA curves for pure PHBV and PHBV compositions.

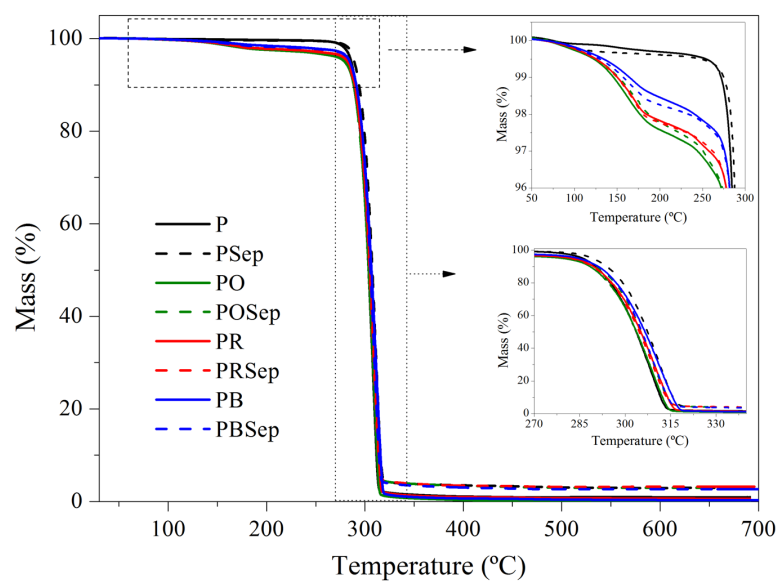

**Suppl. Fig. 3.** (a) Crystallization and (b) melting DSC curves for pure PHBV and PHBV compositions.

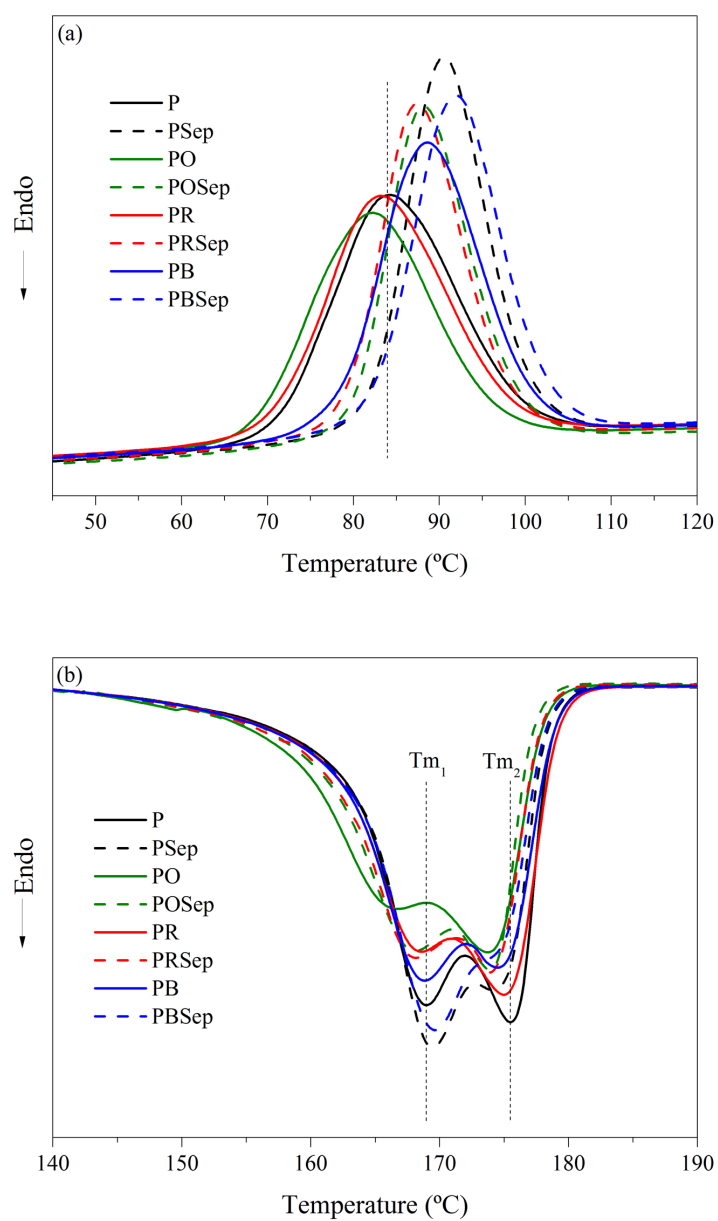

Supplement: d4fb00232f1.pdf [file d4fb00232f1.pdf]
